# Supplementary material for: Gene–Nutrient Interactions in Obesity: COBLL1 Genetic Variants Interact with Dietary Fat Intake to Modulate the Incidence of Obesity
Source: MDPI journal article supplement (doi:10.3390/ijms24043758), 2023-02-13
Supplement: s1 [file s1]

**Table S1.** Association between dietary fat intake and incidence of obesity.

| Dietary fat                        | Person-years | Model 1 <sup>(1)</sup> | Model 2 <sup>(2)</sup> |
|------------------------------------|--------------|------------------------|------------------------|
|                                    |              | HR (95% CI)            | HR (95% CI)            |
| Men ( <i>n</i> = 1540)             |              |                        |                        |
| <15.4 (% energy) ( <i>n</i> = 769) | 7023.1       | 1.00 (Ref.)            | 1.00 (Ref.)            |
| ≥15.4 (% energy) ( <i>n</i> = 771) | 6981.5       | 1.23 (0.97-1.55)       | 1.19 (0.93-1.52)       |
| Continuous (per 1 energy %)        | 14,004.6     | 1.03 (1.01-1.05)       | 1.03 (0.99-1.05)       |
| Women ( <i>n</i> = 1515)           |              |                        |                        |
| <13.7 (% energy) ( <i>n</i> = 758) | 6889.6       | 1.00 (Ref.)            | 1.00 (Ref.)            |
| ≥13.7 (% energy) ( <i>n</i> = 757) | 7068.5       | 1.03 (1.01-1.05)       | 1.03 (0.99-1.05)       |
| Continuous (per 1 energy%)         | 13,958.1     | 0.99 (0.99-1.03)       | 1.01 (0.99-1.03)       |

HR, hazard ratio; CI, confidence interval; Ref., reference.<sup>(1)</sup>Adjusted for age, sex, area, alcohol consumption, smoking, body mass index, education level, household income, and metabolic equivalent of task (MET).<sup>(2)</sup>Adjusted for age, sex, area, alcohol consumption, smoking, body mass index, education level, household income, MET, total energy, and dietary fiber.

**Table S2.** The incidence of obesity stratified by dietary fat intake (<15% energy, ≥15% energy).

| Dietary fat<br>(% energy) | Men (n = 1540)      |  |                       |  | Women (n = 1515)    |  |                       |  |
|---------------------------|---------------------|--|-----------------------|--|---------------------|--|-----------------------|--|
|                           | < 15%               |  | ≥ 15%                 |  | < 15%               |  | ≥ 15%                 |  |
| Person-years              | 6705.5              |  | 7299.1                |  | 8258.0              |  | 5700.1                |  |
| Incident cases (n)        | 125/732             |  | 187/808               |  | 183/909             |  | 132/606               |  |
|                           | HR (95% CI) p-value |  | HR (95% CI) p-value   |  | HR (95% CI) p-value |  | HR (95% CI) p-value   |  |
| Model 1 <sup>(1)</sup>    | 1.00 (Ref.)         |  | 1.27 (1.00-1.61) 0.05 |  | 1.00 (Ref.)         |  | 1.15 (0.91-1.47) 0.25 |  |
| Model 2 <sup>(2)</sup>    | 1.00 (Ref.)         |  | 1.23 (0.96-1.58) 0.11 |  | 1.00 (Ref.)         |  | 1.17 (0.91-1.49) 0.21 |  |

HR, hazard ratio; CI, confidence interval; Ref., reference.<sup>(1)</sup>Adjusted for age, sex, area, alcohol consumption, smoking, body mass index, education level, household income, metabolic equivalent of task (MET).<sup>(2)</sup>Adjusted for age, sex, area, alcohol consumption, smoking, body mass index, education level, household income, MET, total energy, and dietary fiber.

**Table S3.** Association between *COBLL1* rs6717858 genotypes and BMI.

| SNP                     | Chr | Minor allele | BMI (kg/m <sup>2</sup> ) |                            |
|-------------------------|-----|--------------|--------------------------|----------------------------|
|                         |     |              | Beta ± SE                | Add p-value <sup>(1)</sup> |
| <i>COBLL1</i> rs6717858 | 2   | C            | 0.12 ± 1.37              | 0.17                       |

SNP, single nucleotide polymorphism; Chr, chromosome; SE, standard error; Add, additive model; BMI, body mass index.<sup>(1)</sup>Adjusted for age, sex, and area.

**Table S4.** Association between *COBLL1* rs6717858 genotypes and incidence of obesity, stratified by dietary fat intake (<15% energy, ≥15% energy).

|                        |        | Men (n = 1540)   |         |                  |         | Women (n = 1515) |         |                  |         |
|------------------------|--------|------------------|---------|------------------|---------|------------------|---------|------------------|---------|
|                        |        | <15%             |         | ≥15%             |         | <15%             |         | ≥15%             |         |
|                        |        | HR (95% CI)      | P-value |
| Model 1 <sup>(1)</sup> | TT     | 1.00 (Ref.)      |         | 1.22 (0.93-1.61) | 0.14    | 1.00 (Ref.)      |         | 1.31 (1.01-1.70) | 0.0458  |
|                        | CT, CC | 0.99 (0.64-1.53) | 0.96    | 1.39 (0.97-1.99) | 0.07    | 1.64 (1.16-2.30) | 0.0046  | 1.04 (0.60-1.78) | 0.90    |
| Model 2 <sup>(2)</sup> | TT     | 1.00 (Ref.)      |         | 1.18 (0.89-1.57) | 0.25    | 1.00 (Ref.)      |         | 1.34 (1.02-1.75) | 0.03    |
|                        | CT, CC | 0.98 (0.63-1.52) | 0.92    | 1.35 (0.94-1.95) | 0.11    | 1.64 (1.17-2.31) | 0.0046  | 1.02 (0.59-1.76) | 0.93    |

HR, hazard ratio; CI, confidence interval; Ref., reference.<sup>(1)</sup>Adjusted for age, sex, area, alcohol consumption, smoking, body mass index, education level, household income, metabolic equivalent of task (MET).<sup>(2)</sup>Adjusted for age, sex, area, alcohol consumption, smoking, body mass index, education level, household income, MET, total energy, and dietary fiber.

**Table S5.** Distribution of dietary fat intake by *COBLL1* rs6717858 genotypes.

| <b>Dietary fat (% energy)</b>  |                  |                  |                  |
|--------------------------------|------------------|------------------|------------------|
| <b>Men (<i>n</i> = 1540)</b>   | <b>Tertile 1</b> | <b>Tertile 2</b> | <b>Tertile 3</b> |
| Median (ranges)                | 10.7 (2.9-13.2)  | 15.4 (13.2-17.5) | 20.3 (17.5-35.1) |
| Person-years                   | 4717.5           | 4653.1           | 4634.0           |
| Incident cases ( <i>n</i> )    | 84/513           | 109/514          | 119/513          |
| TT                             | 67/416           | 85/393           | 89/411           |
| CT, CC                         | 17/97            | 24/121           | 30/102           |
| <b>Women (<i>n</i> = 1515)</b> | <b>Tertile 1</b> | <b>Tertile 2</b> | <b>Tertile 3</b> |
| Median (ranges)                | 8.9 (1.9-11.5)   | 13.7 (11.5-15.9) | 18.9 (15.9-42.0) |
| Person-years                   | 4582.6           | 4622.1           | 4753.4           |
| Incident cases ( <i>n</i> )    | 97/505           | 108/505          | 110/505          |
| TT                             | 72/400           | 84/431           | 99/422           |
| CT, CC                         | 25/105           | 24/74            | 11/83            |
